# Supplementary material
Source: PubMed Central journal article supplement (PMC3483426)
Supplement: NIHMS410114-supplement-01.pdf [file NIHMS410114-supplement-01.pdf]

**NosA, a transcription factor important in *Aspergillus fumigatus* stress and developmental response, rescues the germination defect of a *laeA* deletion**

Alexandra A. Soukup<sup>a,\*</sup>, Mitra Farnoodian<sup>b,\*</sup>, Erwin Berthier<sup>c</sup>, and Nancy P. Keller<sup>b,c,#</sup>

**Supplementary Information**

Table S1: Primers used in this study

| Primer Name                 | Sequence                                                 | Purpose                                                                 |
|-----------------------------|----------------------------------------------------------|-------------------------------------------------------------------------|
| NosA 5` flank for           | CGGCAAGGTCACGAGCAG                                       | <i>A. fumigatus</i> $\Delta$ <i>nosA</i> and <i>OE::nosA</i> constructs |
| NosA 5` flank Rev pyrG      | CATCCCCTCGTCATCCACCTCCGAGTCC<br>AGGTATCGATAGCTGG         | <i>A. fumigatus</i> $\Delta$ <i>nosA</i> construct                      |
| Ap pyrG For                 | GAGTCGAGGTATCGATAGCTTG                                   | $\Delta$ <i>nosA</i> construct                                          |
| Ap pyrG Rev                 | ATTCGACAATCGGAGAGGCTGC                                   | $\Delta$ <i>nosA</i> construct                                          |
| NosA 3` flank for pyrG      | TGTGTGTTTCCTTGCCTTGCAGCCTCTCC<br>GATTGTCGAATGA           | <i>A. fumigatus</i> $\Delta$ <i>nosA</i> construct                      |
| NosA 3` flank rev           | CAGCTTTGAAACATGAACAGCA                                   | <i>A. fumigatus</i> $\Delta$ <i>nosA</i> construct                      |
| NosA 5` flank rev pyrG&gpdA | CATCCCCTCGTCATCCACGCGTAATACG<br>ACTCACTATAGG             | <i>A. fumigatus</i> <i>OE::nosA</i> construct                           |
| pyrG 3` for pJMP9           | CGTAATACGACTCACTATAGGG                                   | <i>A. fumigatus</i> <i>OE::nosA</i> construct                           |
| gpdA(p) 3`                  | TACCCCGCTTGAGCAGACATCACA                                 | <i>A. fumigatus</i> <i>OE::nosA</i> construct                           |
| NosA 3` for gpdA            | CGGCCTCGAATGCCGCCAAGAGGGTTCGT<br>ACCCCGCTTGAGCAGACATCACA | <i>A. fumigatus</i> <i>OE::nosA</i> construct                           |
| NosA 3` int                 | CAAGACCACTGCGGGATTTCG                                    | <i>A. fumigatus</i> <i>OE::nosA</i> construct                           |
| Af nosA 5' flank ext        | GCACAACACGATCCTGCTGAAC                                   | <i>A. fumigatus</i> $\Delta$ <i>nosA</i> mutant screening               |
| Ap pyrG 3' int              | CTGGACCAAACACATCGATGC                                    | <i>A. fumigatus</i> $\Delta$ <i>nosA</i> mutant screening               |
| gpdA 5' int                 | GCGTCCAAATATCGTGCCTCTCC                                  | <i>A. fumigatus</i> <i>OE::nosA</i> mutant screening                    |
| Af nosA 3' int 2            | GAGGGTCATGCTGAAAGGTGG                                    | <i>A. fumigatus</i> <i>OE::nosA</i> mutant screening                    |
| Af nosA 5' flank for NotI   | NNNGCGGCCCGCCGGCAAGGTCACGAGCA<br>G                       | <i>A. fumigatus</i> complementation                                     |
| Af nosA 3' flank rev NotI   | NNNGCGGCCCGCTGTTCATGTTTCAAA<br>GCTG                      | <i>A. fumigatus</i> complementation                                     |

|                                     |                                                  |                                                          |
|-------------------------------------|--------------------------------------------------|----------------------------------------------------------|
| An nosA 5' flank for NotI           | NNNGCGGCCGCGACGAACTCCCCGCAC<br>C                 | <i>A. nidulans</i> complementation                       |
| An nosA 3' flank rev NotI           | NNNGCGGCCGCGTGAAAGAAAGGTATTG<br>TCTGG            | <i>A. nidulans</i> complementation                       |
| An nosA 5' flank rev pyrG           | CAAGCTATCGATACCTCGACTCGAGGGC<br>AGGTCCAAAGTCG    | <i>A. nidulans</i> $\Delta$ nosA construct               |
| An nosA 3' flank for pyrG           | GCAGCCTCTCCGATTGTCGAATCCTCGAT<br>GGGATCTCGTACA   | <i>A. nidulans</i> $\Delta$ nosA construct               |
| An nosA 5' flank for                | CGACGAACTCCCCGCACC                               | <i>A. nidulans</i> $\Delta$ nosA construct               |
| An nosA 3' flank rev                | GTGAAAGAAAGGTATTGTCTGG                           | <i>A. nidulans</i> $\Delta$ nosA construct               |
| An nosA 5' flank ext                | CTCCAGCTGCACTTCATCACA                            | <i>A. nidulans</i> $\Delta$ nosA PCR screening and probe |
| An nosA 3' int an cpeA 5' for probe | GTTCTTGATACGTTCCCTTGTGC<br>CGTCAGCACAACCTCGGTCTC | <i>A. nidulans</i> $\Delta$ nosA PCR screening and probe |
| an cpeA 3' for probe                | GCACACGAGGCGTTCCTCG                              | <i>A. nidulans</i> northern probe                        |
| an hxtA 5' for probe                | CGTGTCACTGCAATTCAGTTC                            | <i>A. nidulans</i> northern probe                        |
| an hxtA 3' for probe                | ACGGGACCAGTCCGGTCC                               | <i>A. nidulans</i> northern probe                        |
| hphF                                | CGCTCTAGAAGTAGTGGATC                             | Southern probe                                           |
| hphR                                | CACCGGCTGCACATGTCAA                              | Southern probe                                           |
| af hxtA 5' for probe F              | CAGCAGTATGAGCGGTGCG                              | <i>A. fumigatus</i> northern probe                       |
| af hxtA 3' rev probe                | CTCGCTGTGAGCAGCGACC                              | <i>A. fumigatus</i> northern probe                       |
| af cat2 probe 5'                    | AGGAGCAGTCGTCGCAGCC                              | <i>A. fumigatus</i> northern probe                       |
| af cat2 probe 3'                    | GGTTCATTACCTTGTTCACGC                            | <i>A. fumigatus</i> northern probe                       |
| af sod1 F                           | TCATTGCTGTCCTCCGTGGTG                            | semi-quantitative RT-PCR                                 |
| af sod1 R 2                         | GCGCTCGGAGTCCTCAGG                               | semi-quantitative RT-PCR                                 |

|             |                          |                          |
|-------------|--------------------------|--------------------------|
| af sod2 F 2 | GGTAAGATGAACACCGCTTTG    | semi-quantitative RT-PCR |
| af sod2 R   | CTTCTCCACAGCCTTCCAGTTG   | semi-quantitative RT-PCR |
| af sod3 F   | CTACGATGCCCTCCAACCCTAC   | semi-quantitative RT-PCR |
| af sod3 R 2 | AAGAGGGAATGGTTGATGTGC    | semi-quantitative RT-PCR |
| af sod4 F   | ACAAGTTCGCCAAGGACATTATCG | semi-quantitative RT-PCR |
| af sod4 R 2 | TGTGGGTGGCCATATCTACC     | semi-quantitative RT-PCR |
| af arpA F 2 | CCAAGACGCGATTACCCGC      | semi-quantitative RT-PCR |
| af arpA R   | TCTTCGTGCCATTCGTCTG      | semi-quantitative RT-PCR |
| af catA F   | CCGATGAAGGCAACTGGGAC     | semi-quantitative RT-PCR |
| af catA R   | GGTCAGACATGGCCCACATG     | semi-quantitative RT-PCR |
| af cat1 F 2 | CATCAACCAACCTCGCGTTC     | semi-quantitative RT-PCR |
| af cat1 R 2 | GGCTGAGACCAGACATCCTC     | semi-quantitative RT-PCR |
| af cat2 F   | GCACACGGCCGTCTCCAAC      | semi-quantitative RT-PCR |
| af cat2 R 2 | CCCACGAGATCTTGTTGCCG     | semi-quantitative RT-PCR |
| af nosA F   | GCAGACGAAGATGAATGAGCG    | semi-quantitative RT-PCR |
| af nosA R   | AAGTCTGTCGTTCTGTCTTGAC   | semi-quantitative RT-PCR |

Figure S1

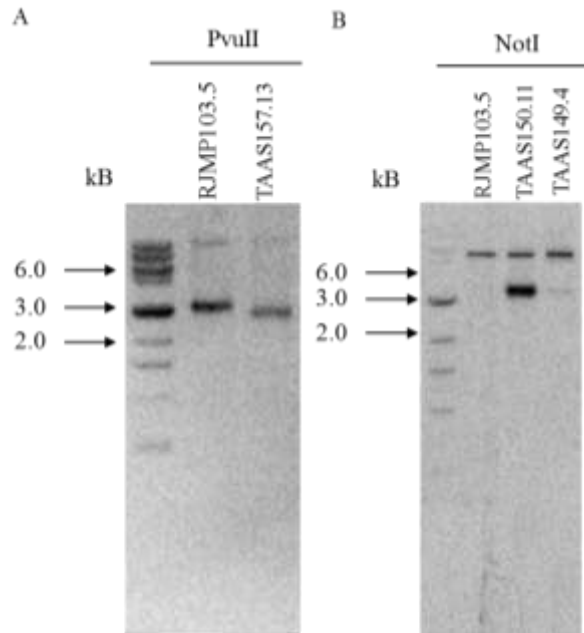

Fig. S1. Southern digests confirm *A. nidulans* transformants. A. Confirmation of TAAS157.13 (*ΔnosA*) using a PvuII digestion. Expected sizes are: RJMP103.5 - 3263 bp; TAAS157.13 - 2708 bp. Probe was created using An nosA 5' flank for and An nosA 5' flank rev pyrG to amplify template. B. Confirmation of transformants for complementation testing using NotI. Expected sizes are: RJMP103.5 - 24945 bp; TAAS150.11 (+*A.n. nosA*) - 4361 bp; TAAS149.4 (+*A.f. nosA*) - 4100 bp. Dual probes were created using An nosA 5' flank for and An nosA 3' flank rev and Af nosA 5' flank for and Af nosA 3' flank rev to amplify templates.

Figure S2

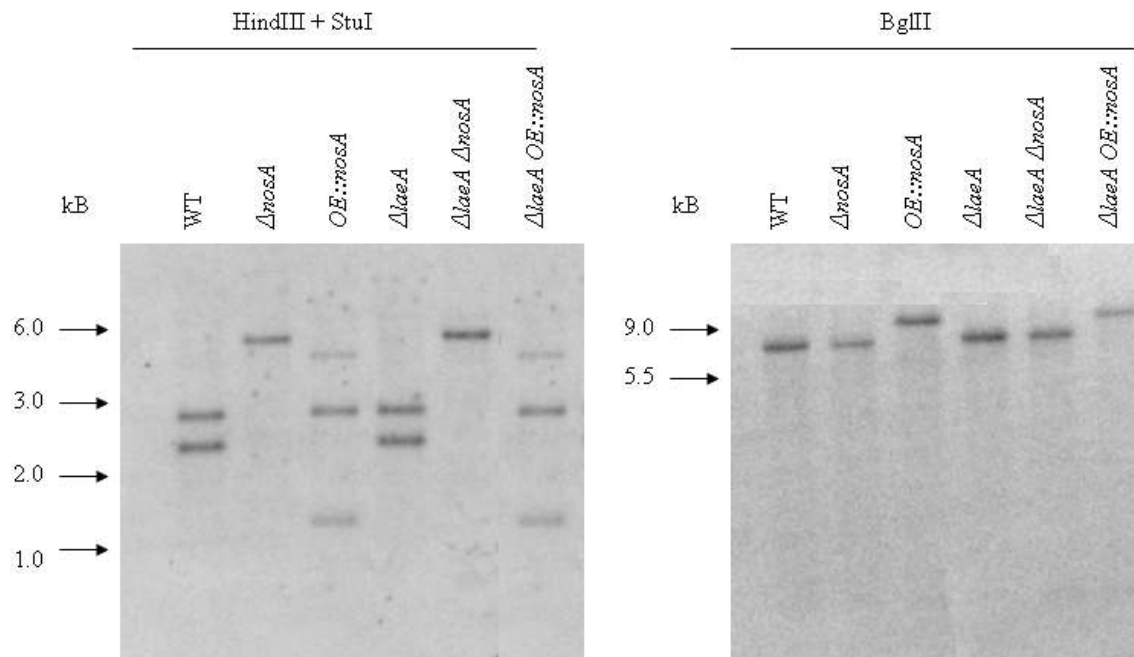

Fig. S2. Southern blot using HindIII + StuI or BglIII confirms correct *A. fumigatus* transformants. Predicted fragment sizes in bp for HindIII + StuI are WT: 2955 and 2366,  $\Delta nosA$ : 5494, *OE::nosA*: 4603, 2955, and 1366. Predicted fragment sizes in bp for BglIII are wild type: 5567,  $\Delta nosA$ : 5497, *OE::nosA*: 9097. Strains correspond to WT – TFYL20.10,  $\Delta nosA$  - TAAS104, *OE::nosA* – TAAS105,  $\Delta laeA$  – TFYL19.3,  $\Delta laeA \Delta nosA$  – TAAS107,  $\Delta laeA OE::nosA$  – TAAS108. Probe was created using Af nosA 5' flank for and Af nosA 3' flank rev to amplify template.

Figure S3

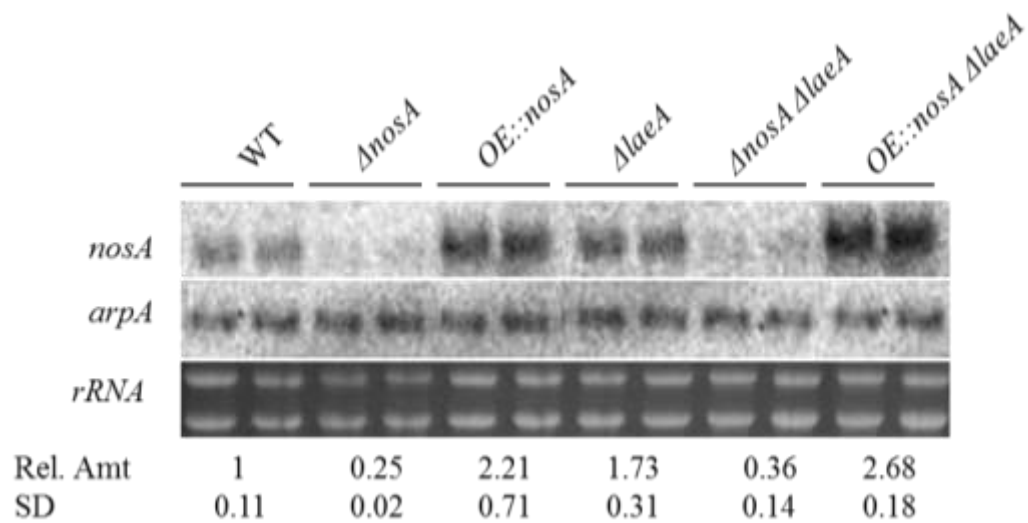

Fig. S3. Northern blots confirm overexpression of *nosA* and deletion of *nosA* in both wild type and  $\Delta laeA$  backgrounds of *A. fumigatus*. Note that  $\Delta laeA$  also displays increased *nosA* transcript relative to wild type under these conditions, confirming the results of the previously published microarray (Perrin et al., 2007). Actin related protein A (*arpA*) was used as a loading control. Amounts given are of *nosA* transcript normalized to *arpA* levels, relative to wild type. Strains correspond to WT – TFYL20.10,  $\Delta nosA$  - TAAS104, OE::*nosA* – TAAS105,  $\Delta laeA$  – TFYL19.3,  $\Delta laeA \Delta nosA$  – TAAS107,  $\Delta laeA$  OE::*nosA* – TAAS108.

Figure S4.

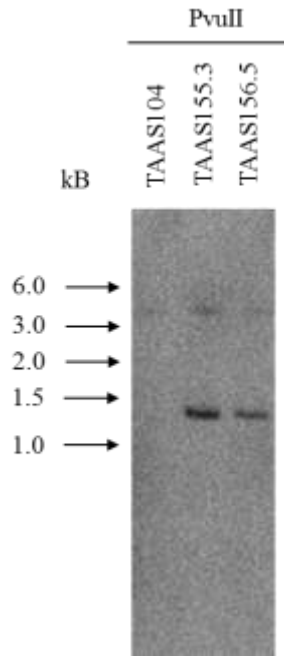

Fig. S4. Southern digest confirming *A. fumigatus* complementation strains using EcoRI.

Expected sizes are: TAAS104 – no fragment; TAAS155.3 (+ *A.f. nosA*) and TAAS156.5 (+ *A.n. nosA*) – 1426 bp. hphF and hphR were used to amplify template DNA for the probe.

Figure S5

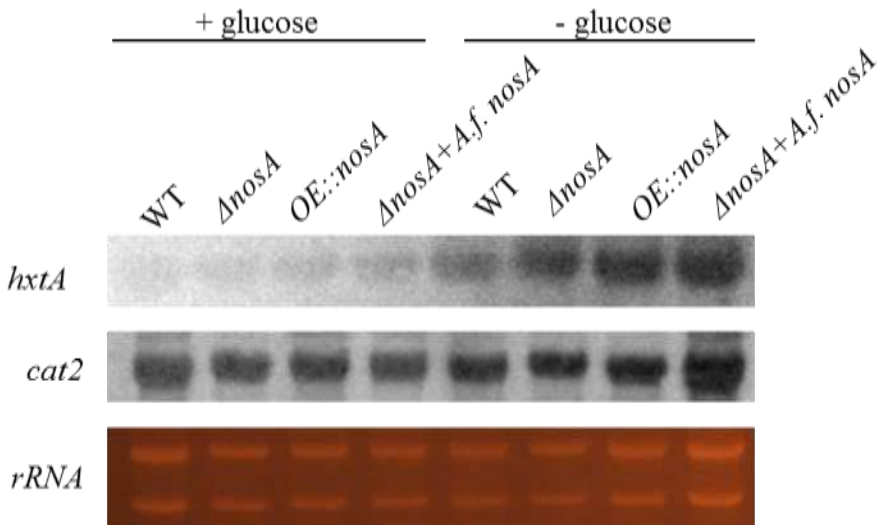

Fig. S5. *A. fumigatus nosA* does not influence expression of *cat2* or *hxtA*. When carbon is absent from the culture, both *cat2* and *hxtA* transcript levels increase in all strains tested, regardless of *nosA* genotype. Strains correspond to WT – TFYL20.10,  $\Delta nosA$  - TAAS104, *OE::nosA* – TAAS105,  $\Delta nosA + A.f. nosA$  – TAAS155.3.



Figure S6

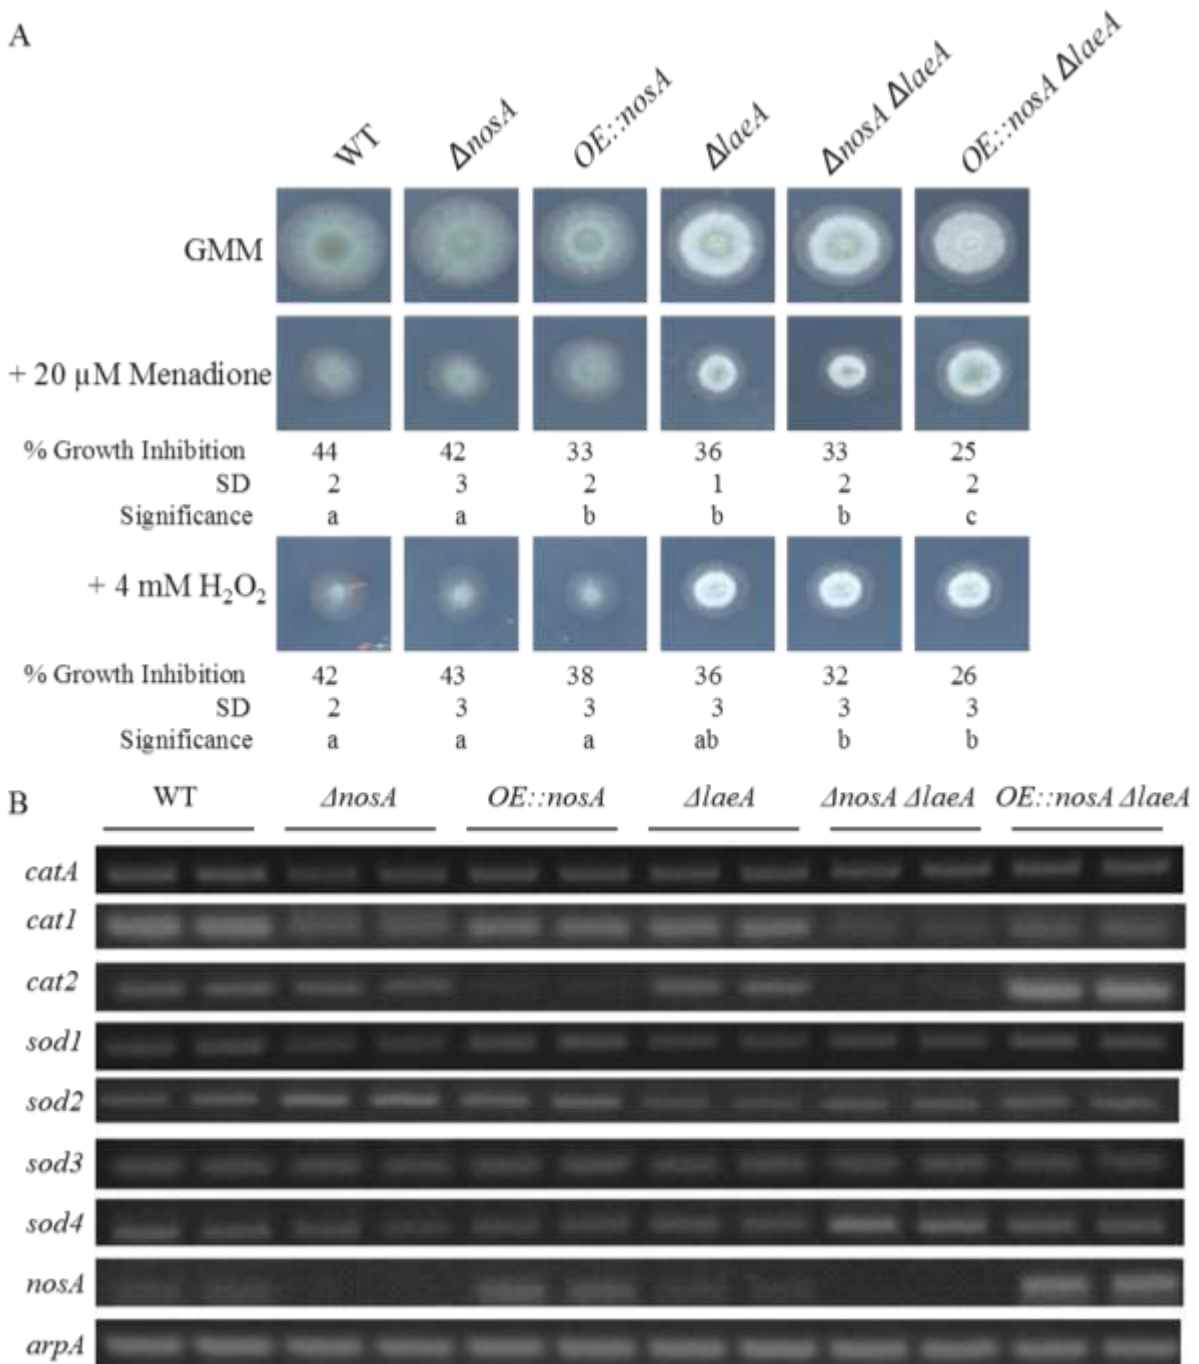

Fig. S6. Resistance to chemicals which generate reactive oxygen species. A. Overexpression of *nosA* results in increased resistance to 20  $\mu$ M menadione, as evidenced by an increased ratio of

treated/untreated colony diameter. This increase is independent of *laeA*, as increased resistance occurs in both wild type and  $\Delta laeA$  backgrounds.  $\Delta laeA$  also exhibits a statistical increase in menadione resistance relative to WT, which is not abrogated by deletion of *nosA*. No significant differences were seen for resistance to 4 mM hydrogen peroxide among *nosA* mutants in their respective control backgrounds (e.g. WT or  $\Delta laeA$ ) although the double *nosA*  $\Delta laeA$  mutants were more resistant to hydrogen peroxide than wild type and single *nosA* mutants. Letters represent significant differences at  $p < 0.05$ . B. Semi-quantitative RT-PCR examining catalase and superoxide dismutase transcript levels in *nosA* mutants. *OE::nosA* strains do not exhibit a significant increase in transcript levels of any catalase or superoxide dismutase tested.  $\Delta nosA$  shows a slight increase in *sod2* transcript, but maintains wild type transcript levels of other genes. Actin related protein A (*arpA*) was used as a loading control. Strains correspond to WT – TFYL20.10,  $\Delta nosA$  - TAAS104, *OE::nosA* – TAAS105,  $\Delta laeA$  – TFYL19.3,  $\Delta laeA$   $\Delta nosA$  – TAAS107,  $\Delta laeA$  *OE::nosA* – TAAS108.

Figure S7

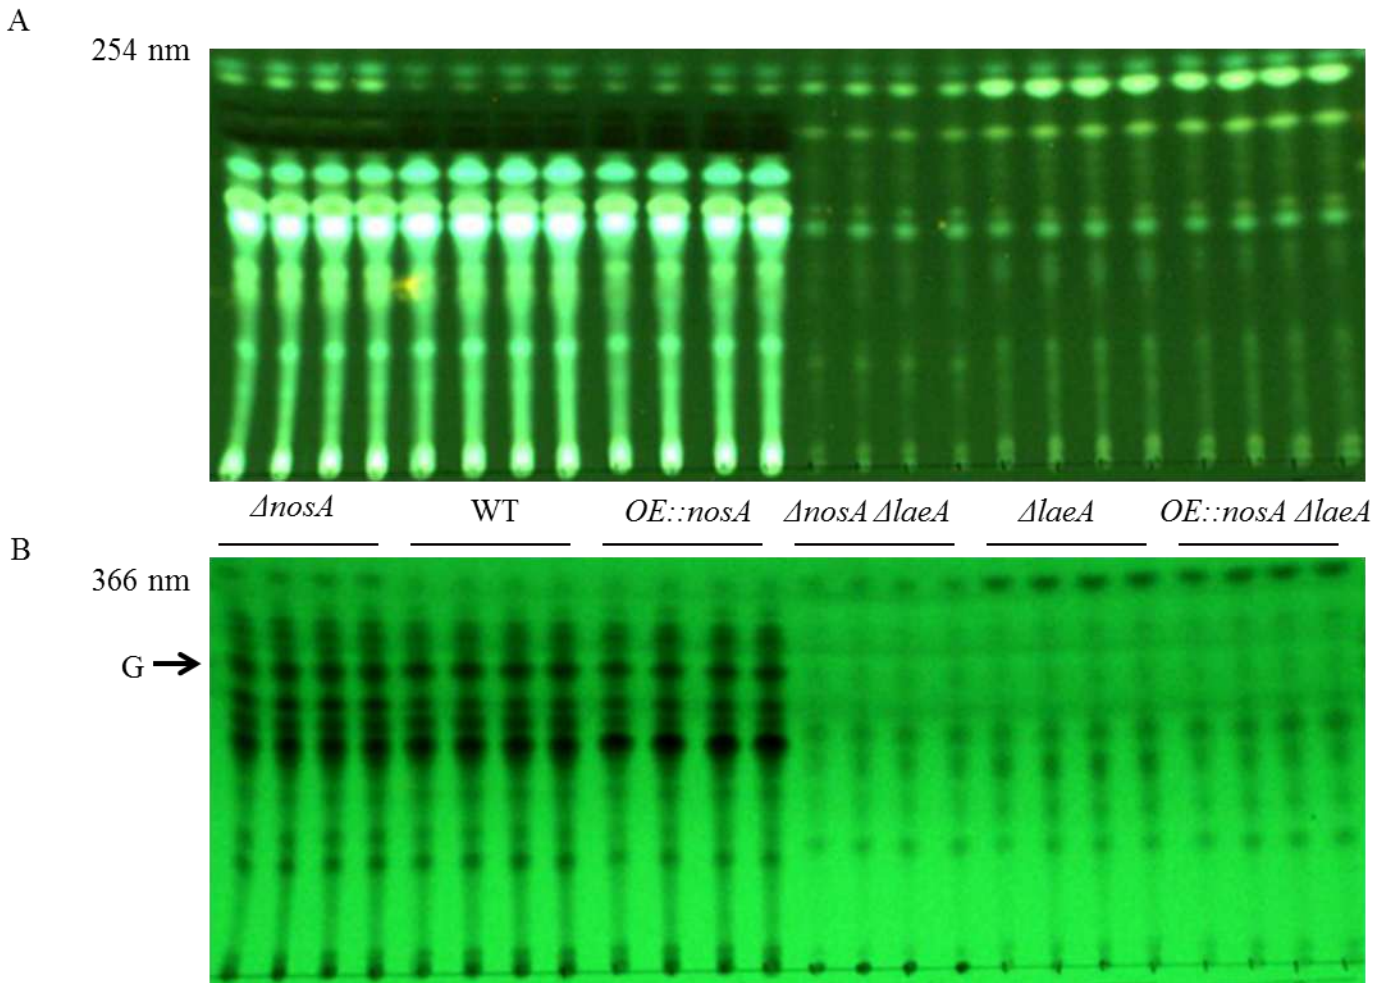

Fig. S7. NosA mutants show only minor differences in SM profiles. A. TLC analysis visualized under 254 nm light. 4 replicates of each strain are shown. B. TLC analysis visualized under 366 nm light. 4 replicates of each strain are shown. The band correlating to gliotoxin is indicated (G). Strains correspond to WT – TFYL20.10, *ΔnosA* - TAAS104, *OE::nosA* – TAAS105, *ΔlaeA* – TFYL19.3, *ΔlaeA ΔnosA* – TAAS107, *ΔlaeA OE::nosA* – TAAS108.

Figure S8

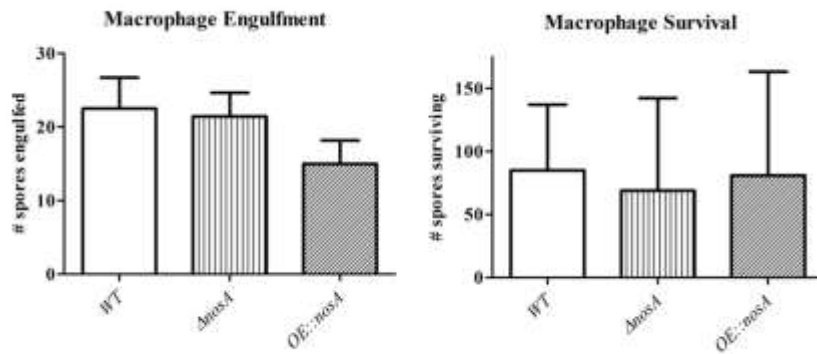

Fig. S8. NosA mutants do not differ in macrophage engulfment or survival. A. Engulfment of conidia after a 1 hour incubation with purified human primary macrophages. B. Survival of engulfed conidia. 4 hours post-engulfment, the numbers of surviving conidia were quantified and normalized to engulfed conidia. No differences were seen between the strains for either engulfment or spore survival. Strains correspond to WT – TFYL20.10,  $\Delta nosA$  - TAAS104,  $OE::nosA$  – TAAS105.
